# Supplementary material
Source: PubMed Central journal article supplement (PMC3794688)
Supplement: 10.3163.1536-5050.101.4.014.sg001.pdf [file 10.3163.1536-5050.101.4.014.sg001.pdf]

## **New roles for hospital librarians: a benchmarking survey of disaster management activities**

**Amy E. Donahue, MLIS, AHIP; Robin M. Featherstone, MLIS**

### **APPENDIX A**

#### **Survey invitation: hospital librarians survey: emergency/disaster involvement**

The objective of this survey is to look at whether hospital librarians are actively involved in their organizations' emergency and disaster preparedness activities and, if so, how. Some demographics will also be captured. By exploring what roles currently exist and presenting these findings in a poster at the 2012 Medical Library Association annual meeting in Seattle, WA, it is the authors' hope that hospital librarians can continue their involvement in this vital area and learn from each other.

Disclaimer: This survey has been exempted from institutional review board (IRB) oversight as the Aurora Health Care IRB has determined it does not constitute human subject research. Results will be kept confidential and presented only in aggregate. Any personally identifiable information provided (optional) will be disassociated from responses and will only be used by the author to follow up on individual disaster/emergency experiences.

Survey deadline: Wednesday, February 29, 2012 (11:59 p.m., central standard time). The survey should take 5–15 minutes to complete, depending on the depth of your responses.

If you have any questions, please feel free to contact me.

Link to the Google Forms Survey:

[https://docs.google.com/spreadsheets/viewform?formkey=dGJfUkVVcER2R2xsWkJKGc2RzSGRfd0E6MQ\\_](https://docs.google.com/spreadsheets/viewform?formkey=dGJfUkVVcER2R2xsWkJKGc2RzSGRfd0E6MQ_) (If the link does not work, try copying and pasting into your browser. Thanks!)

Thank you.
