# Supplementary material
Source: PubMed Central journal article supplement (PMC3794688)
Supplement: 10.3163.1536-5050.101.4.014.sg002.pdf [file 10.3163.1536-5050.101.4.014.sg002.pdf]

## **New roles for hospital librarians: a benchmarking survey of disaster management activities**

**Amy E. Donahue, MLIS, AHIP; Robin M. Featherstone, MLIS**

### **APPENDIX B**

#### **Survey instrument**

Are you a hospital librarian? (For this survey, a hospital librarian is someone who currently is either based in a hospital or who directly provides information services to a hospital and its clinicians, administration, and patients (e.g., as an academic health sciences librarian whose liaison duties include supporting an affiliated hospital).

Job title:

Type of hospital that you primarily support:

- Small community hospital (0–200 beds)
- Medium community hospital (200–500 beds)
- Large community hospital (500+ beds)
- Academic medical center–affiliated hospital
- Specialized hospital, any size (e.g., children’s, trauma center, cancer center, etc.)
- Teaching hospital, any size
- Multi-hospital system
- Other: \_\_\_\_\_

Is your hospital:

- Nonprofit
- Military/other government
- For profit
- Don't know/not sure

National Network of Libraries of Medicine (NN/LM) Region

- Greater Midwest (IA, IL, IN, KY, MI, MN, ND, OH, SD, WI)
- MidContinental (CO, KS, MO, UT, WY)
- Middle Atlantic (DE, NJ, NY, PA)
- New England (CT, MA, ME, NH, RI, VT)
- Pacific Northwest (AK, ID, MT, OR, WA)
- Pacific Southwest (AZ, CA, HI, NV, US Territories in the Pacific Basin)
- South Central (AR, LA, NM, OK, TX)
- Southeastern/ Atlantic (AL, DC, FL, GA, MD, MS, NC, SC, TN, VA, WV, Puerto Rico, US Virgin Islands)
- Outside of the United States

Are you (or have you been) personally involved with emergency management (preparedness, response, and/or recovery) in any way at your current hospital?

No:

- Would you be interested in being involved with emergency/disaster activities at your hospital?
- Although you are not actively involved, in the event of a disaster or emergency that affected your hospital, would you have a specific, hospital-assigned role to play?  
If you answered yes to the question above, please describe your role:

- 
- Have you played a part in a disaster or emergency that affected your hospital?
- 
- If you have played a part in a disaster or emergency and if you are willing to describe your experience, please provide your contact information (phone number and/or email address) so that the author of this study can follow up with you. Your info will be deleted after contact has been made and will not be stored with the rest of your responses.
- 

Yes:

- In what ways are you or have you been involved in emergency/disaster activities at your hospital?
    - As a creator of an emergency plan for your library or department
    - As a collector/provider of emergency/disaster resources for your users (books, pamphlets, electronic resources, etc.)
    - As a researcher, providing lit searches on emergency and disaster topics
    - As a trainer, providing health care providers with demos or training on emergency tools (such as Radiation Event Medical Management [REMM], Wireless Information System for Emergency Responder [WISER], disaster/emergency websites, etc.)
    - As a community educator, involved with classes or outreach events on emergency topics
    - As a member of hospital emergency planning committees, councils, etc.
    - As a member of a hospital incident command team
    - Other: \_\_\_\_\_
  - How did you get involved?
- 
- Are you involved in supporting the information needs of hospital staff and/or affiliates who respond to regional, national, or international disasters (such as Medical Reserve Corps or physicians who responded to the Haiti earthquake)?
  - Have you played a part in a disaster or emergency that affected your hospital?
  - If you have played a part in a disaster or emergency and if you are willing to describe your experience, please provide your contact information (phone number and/or email address) so that the author of this study can follow up with you. Your info will be deleted after contact has been made and will not be stored with the rest of your responses.

Are you familiar with the DISASTR-OUTREACH-LIB email discussion list? \_\_\_\_\_
